# Supplementary material for: Neoadjuvant Stereotactic Radiotherapy for Brain Metastases: Systematic Review and Meta-Analysis of the Literature and Ongoing Clinical Trials
Source: MDPI journal article supplement (doi:10.3390/cancers14174328), 2022-09-04

**Supplementary File S3.** Funnel plots of pooled rates of: **A.** radiation necrosis; **B.** symptomatic radiation necrosis; **C.** local recurrences; **D.** distant brain recurrences; **E.** leptomeningeal disease; **F.** local control at 12 months; **G.** overall survival at 6 months; **H.** overall survival at 12 months; **I.** overall survival at 24 months.

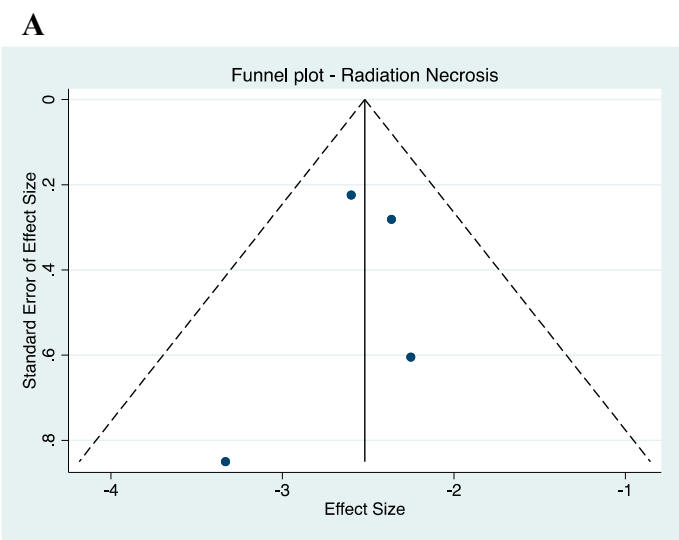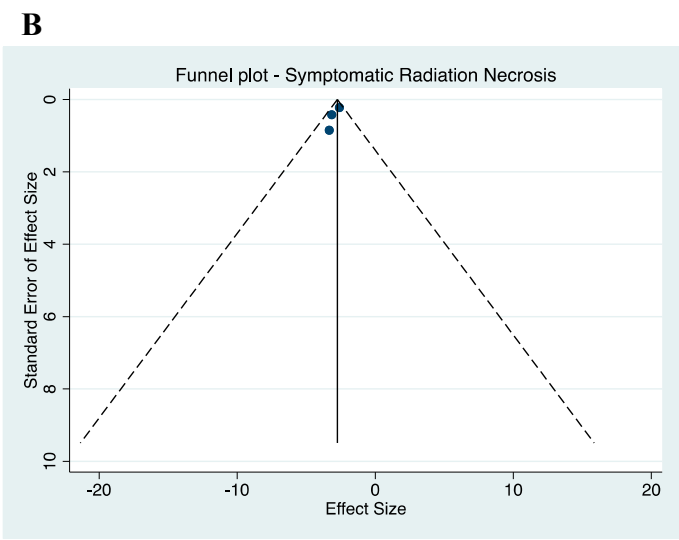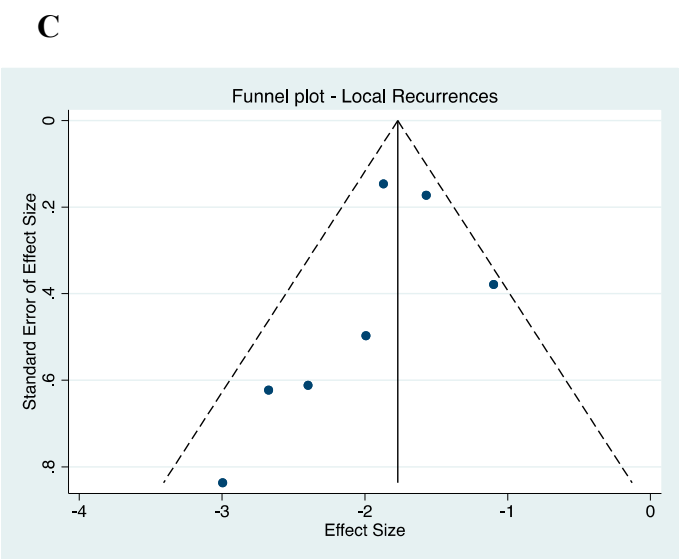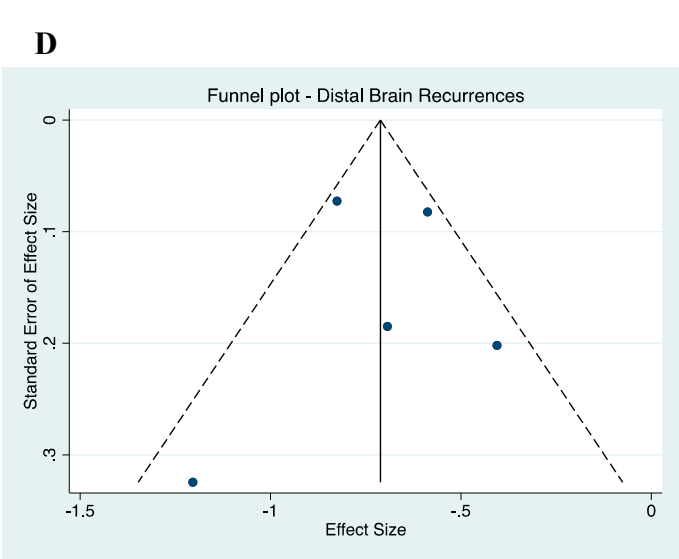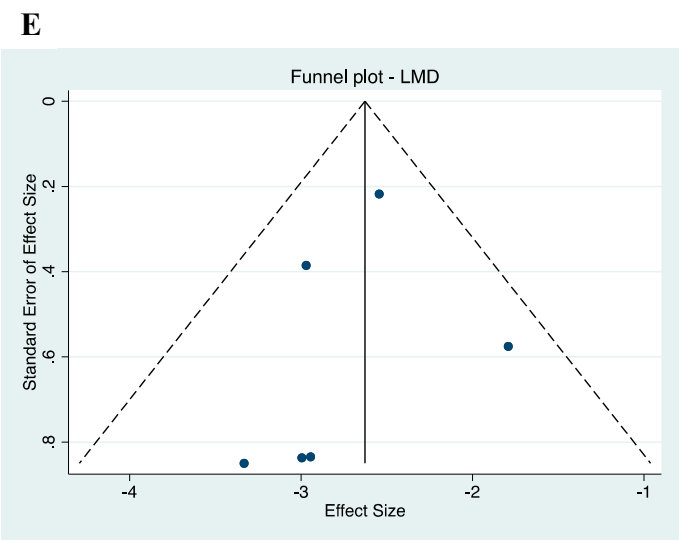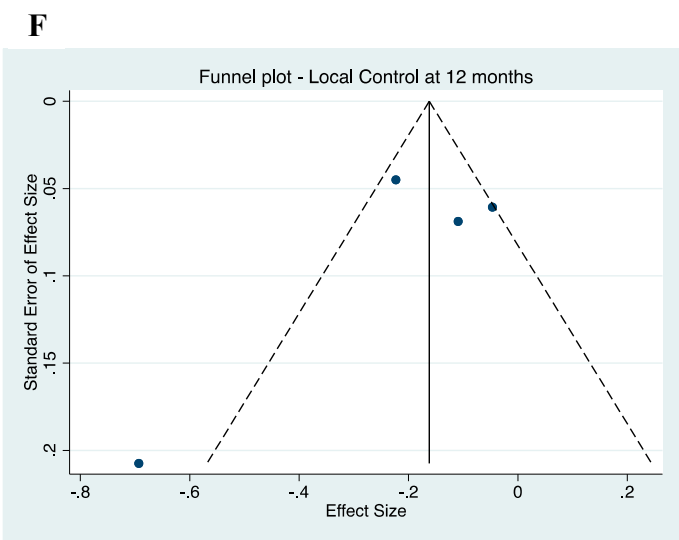

G

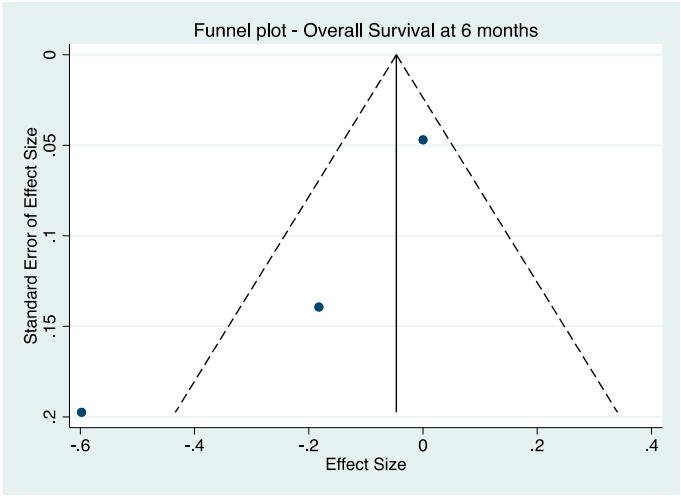

H

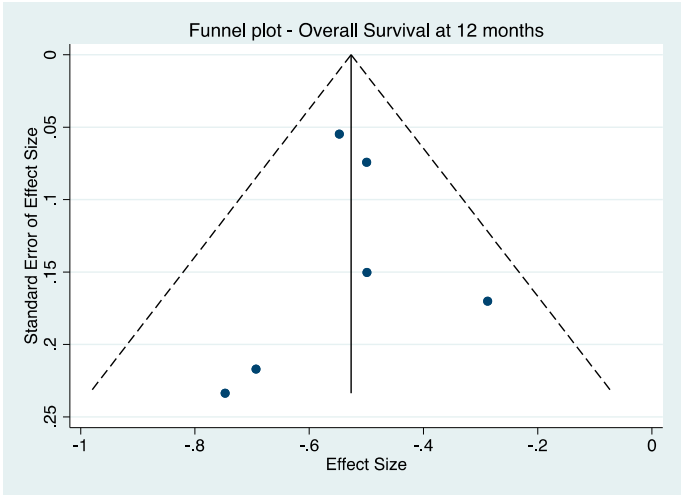

I

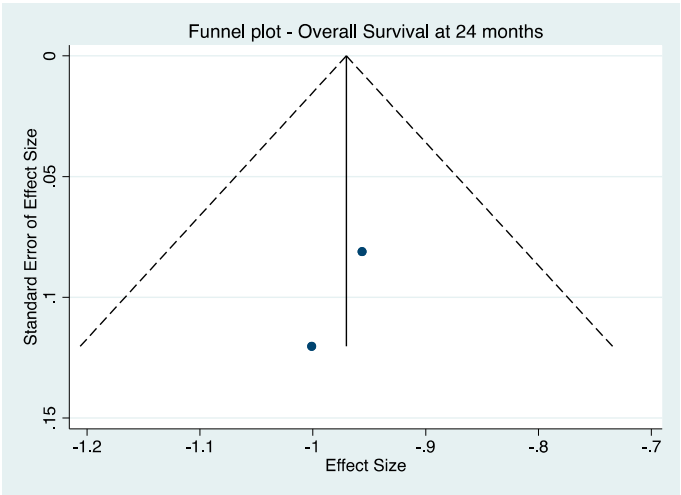

Supplement: s1 [file s1]
