# Supplementary material for: Neoadjuvant Stereotactic Radiotherapy for Brain Metastases: Systematic Review and Meta-Analysis of the Literature and Ongoing Clinical Trials
Source: MDPI journal article supplement (doi:10.3390/cancers14174328), 2022-09-04
Supplement: s1 [file s1]

**Supplementary File S1. Risk of bias assessments for included studies.**

| Joanna Briggs Institute Checklist – Criteria                                                                     |
|------------------------------------------------------------------------------------------------------------------|
| 1. Were there clear criteria for inclusion in the case series?                                                   |
| 2. Was the condition measured in a standard, reliable way for all participants included in the case series?      |
| 3. Were valid methods used for identification of the condition for all participants included in the case series? |
| 4. Did the case series have consecutive inclusion of participants?                                               |
| 5. Did the case series have complete inclusion of participants?                                                  |
| 6. Was there clear reporting of the demographics of the participants in the study?                               |
| 7. Was there clear reporting of clinical information of the participants?                                        |
| 8. Were the outcomes or follow up results of cases clearly reported?                                             |
| 9. Was there clear reporting of the presenting site(s)/clinic(s) demographic information?                        |
| 10. Was statistical analysis appropriate?                                                                        |
| <b>Responses Options:</b> Yes, No, Unclear, Not Applicable (NA)                                                  |
| <b>Quality Rating:</b> Poor 0 – 3; Fair 4 – 7; Good 8 – 10                                                       |

[illegible]
