# Supplementary material for: Neoadjuvant Stereotactic Radiotherapy for Brain Metastases: Systematic Review and Meta-Analysis of the Literature and Ongoing Clinical Trials
Source: MDPI journal article supplement (doi:10.3390/cancers14174328), 2022-09-04
Supplement: s1 [file s1]

## Supplementary File S2. Overview of all ongoing clinical trials.

| Principal Investigators (Trial Number) | Study Type – Phase                                  | Institution(s)                                            | Estimated enrollment | Inclusion criteria                                                                                                                                                                                                                                                                                                                                                                                                                          | Exclusion criteria                                                                                                                                                                                                                                                                                                                                                                                                                                                                                                                                                                                                                                                                                      | Intervention              | Comparator Arm                        | Primary outcomes                                                             | Secondary outcomes                                                                                                                                                                                                                                                                                                                 |
|----------------------------------------|-----------------------------------------------------|-----------------------------------------------------------|----------------------|---------------------------------------------------------------------------------------------------------------------------------------------------------------------------------------------------------------------------------------------------------------------------------------------------------------------------------------------------------------------------------------------------------------------------------------------|---------------------------------------------------------------------------------------------------------------------------------------------------------------------------------------------------------------------------------------------------------------------------------------------------------------------------------------------------------------------------------------------------------------------------------------------------------------------------------------------------------------------------------------------------------------------------------------------------------------------------------------------------------------------------------------------------------|---------------------------|---------------------------------------|------------------------------------------------------------------------------|------------------------------------------------------------------------------------------------------------------------------------------------------------------------------------------------------------------------------------------------------------------------------------------------------------------------------------|
| <b>Rogers [34] (NCT05124236)</b>       | Interventional – II Randomized, Parallel assignment | Kantonsspital Aarau                                       | 200                  | 1) Age $\geq 18$ years; 2) KPS $\geq 60$ ; 3) Histological diagnosis primary tumor; 4) Able take steroids; 5) No contraindication MRI; 6) MRI-diagnosed $\leq 3$ contrast-enhancing brain metastases of $\leq 4$ cm diameter; 7) estimated survival $> 12$ months; 8) PLT $> 100$ /mL, INR $< 1.3$ , Hb $> 7.5$ g/dL; 9) Willing and able to give consent and participate in all evaluations                                                | 1) Radiosensitive tumor histology (germ cell, lymphoma, multiple myeloma); 2) $> 10$ mm midline shift, 4 <sup>th</sup> ventricle compression, signs intracranial hypertension requiring emergency decompression; 3) $\geq 4$ brain metastases and/or $\geq 4$ cm diameter; 4) $> 1$ metastases requiring resection; 5) LM in CSF or at MRI; 6) prior WBRT or SRS/SRT to the lesion to be resected; 7) prior non-meningioma tumor diagnosis and/or resection; 8) prior radionuclide therapy within 30 days; 9) prior anti-VEGF therapy within 6 weeks; 10) pregnancy, lactation, or not willing to undergo contraception                                                                                 | NaSRS + Tumor resection   | Tumor resection + Postoperative hfSRT | 1) LM rate at 12-month                                                       | 1) Local control at 3/6/12-month; 2) Distant failure at 3/6/12-month; 3) Radiation necrosis at 3/6/12-month; 4) Quality of life (QLQ30 and BN20) at 3/6/12-month                                                                                                                                                                   |
| <b>Brun [35] (NCT04503772)</b>         | Interventional – II Single group                    | Group Interregional de Recherche Clinique et d'innovation | 70                   | 1) Age $\geq 18$ years; 2) KPS $\geq 70$ ; 3) Histological diagnosis primary tumor; 4) Affiliation to the French social security system; 5) No contraindication MRI; 6) MRI-diagnosed $\leq 4$ brain metastases of $\leq 5$ cm diameter, one indicated for surgery; 7) estimated survival $> 6$ months; 8) Negative pregnancy test $\geq 7$ days prior to start SRS; 9) Willing and able to give consent and participate in all evaluations | 1) Radiosensitive tumor histology (germ cell, lymphoma, multiple myeloma, leukemia); 2) Metastases from SCLC, renal cancer, melanoma, sarcoma; 3) $> 5$ mm midline shift, 4 <sup>th</sup> ventricle compression, signs intracranial hypertension requiring emergency decompression; 4) $> 4$ brain metastases; 5) LM in CSF or at MRI; 6) prior WBRT or SRS/SRT to the lesion to be resected; 7) proximity to organs at risk not allowing prescribed target dose; 8) surgical delay $> 3$ days after SRS; 9) prior anti-VEGF therapy within 6 weeks; 10) pregnancy, lactation, or not willing to undergo contraception; 11) Psychological disorder or other reasons interfering with patient compliance | HfNaSRS + Tumor resection | No                                    | 1) Local control at 6-month                                                  | 1) Local control at 12-month; 2) Distant control at 3/6/9/12-month; 3) Radiation necrosis at 12-month; 4) Overall survival at 3/6/9/12-month; 5) Acute ( $< 3$ -month) and delayed ( $> 3$ -month) toxicities; 6) Predictive factors; 7) Cognitive function (MMSE) at 3/6/9/12-month; 8) Quality of life (QLQ30) at 3/6/9/12-month |
| <b>Bovi [39] (NCT04545814)</b>         | Interventional – II Single group                    | Froedtert Hospital & Medical College of Wisconsin         | 10                   | 1) Age $\geq 18$ years; 2) SRS candidate; 3) MRI-diagnosed $\leq 4$ contrast-enhancing brain metastases of $\leq 5$ cm diameter, one indicated for surgery; 4) estimated survival $> 6$ months; 5) Surgical resection $\leq 10$ days after SRS; 6) postmenopausal $\geq 1$ year or contraception use; 7) Willing and able to give consent and participate in all evaluations                                                                | 1) Planned adjuvant focal brain therapy; 2) $\geq 4$ brain metastases and/or $\geq 5$ cm diameter; 3) LM in CSF or at MRI; 4) prior WBRT or SRS/SRT to the lesion to be resected; 5) prior anti-VEGF therapy within 6 weeks; 6) pregnancy, lactation, or not willing to undergo contraception; 7) Psychological disorder or other reasons interfering with patient compliance                                                                                                                                                                                                                                                                                                                           | NaSRS + Tumor resection   | No                                    | 1) Cured rate at 20-month (no. patients with no identifiable disease at MRI) | 1) Progression free survival at 6/12/18-month; 2) Overall survival at 6/12/18-month; 3) LM at 24-month; 4) Radiation necrosis at 24-month; 5) Quality of life (MDASI-BT) every 3 months up to 24-month                                                                                                                             |
| <b>Agrawal [40] (NCT03398694)</b>      | Interventional – II Single group                    | Indiana University School of Medicine                     | 50                   | 1) Age $\geq 18$ years; 2) Resection $\leq 4$ days after SRS; 3) No contraindication MRI; 4) MRI-diagnosed $\leq 4$ brain metastases of $\leq 5$ cm diameter; 5) estimated survival                                                                                                                                                                                                                                                         | 1) $> 4$ brain metastases and/or $\geq 5$ cm diameter; 2) LM in CSF or at MRI; 3) prior WBRT or SRS/SRT to the lesion to be resected; 4) prior anti-VEGF therapy within 6 weeks; 5) pregnancy, lactation, or not willing to undergo                                                                                                                                                                                                                                                                                                                                                                                                                                                                     | NaSRS + Tumor resection   | No                                    | 1) Local control at 6-month                                                  | 1) Overall survival at 6/12/24-month; 2) Progression free survival at 6/12/24-month; 3) Distant failure at 24-                                                                                                                                                                                                                     |

|                                       |                                                        |                                                      |    |                                                                                                                                                                                                                                                                                                        |                                                                                                                                                                                                                                                                                                                                                                                                                                                            |                                    |    |                                                                                                                                                                                                                                        |
|---------------------------------------|--------------------------------------------------------|------------------------------------------------------|----|--------------------------------------------------------------------------------------------------------------------------------------------------------------------------------------------------------------------------------------------------------------------------------------------------------|------------------------------------------------------------------------------------------------------------------------------------------------------------------------------------------------------------------------------------------------------------------------------------------------------------------------------------------------------------------------------------------------------------------------------------------------------------|------------------------------------|----|----------------------------------------------------------------------------------------------------------------------------------------------------------------------------------------------------------------------------------------|
|                                       |                                                        |                                                      |    | >6 months; 6) PLT >100/mL, INR <1.3, Hb >7.5g/dL, ANC>1500/count; 7) Willing and able to give consent and participate in all evaluations                                                                                                                                                               | contraception; 7) Psychological disorder or other reasons interfering with patient compliance                                                                                                                                                                                                                                                                                                                                                              |                                    |    | month; 4) Radiation necrosis at 24-month; 5) LMD at 24-month; 6) Correlation with RNA biomarkers                                                                                                                                       |
| <b>Shultz [41]</b><br>(NCT03368625)   | Interventional – II Single group                       | University Health Network, Toronto                   | 30 | 1) Age ≥18 years; 2) KPS ≥60; 3) No contraindication MRI; 4) MRI-diagnosed ≤6 contrast-enhancing brain metastases of >2cm and <4cm diameter; 5) estimated survival ≥3 months; 6) Willing and able to give consent and participate in all evaluations                                                   | 1) Radiosensitive tumor histology (germ cell, lymphoma, SCLC, seminoma, primary brain tumor); 2) lesion ≤2mm close to the optic chiasm; 3) midline shift, 4 <sup>th</sup> ventricle compression, signs intracranial hypertension requiring emergency decompression; 4) LM in CSF or at MRI; 5) prior WBRT or SRS/SRT to the lesion to be resected; 6) prior chemotherapy within <7 days; 10) pregnancy, lactation, or not willing to undergo contraception | NaSRS + Tumor resection            | No | 1) Radiation toxicity at 12-month<br><br>1) Local control at 12-month; 2) Progression free survival at 12-month; 3) Overall survival at 12-month; 4) LM at 12-month                                                                    |
| <b>Shiao [42]</b><br>(NCT03163368)    | Interventional – II Single group                       | Cedars-Sinai Medical Center                          | 25 | 1) Age ≥18 years; 2) KPS ≥60; 3) Histological diagnosis primary tumor; 4) MRI-diagnosed brain metastases of <4cm diameter; 5) estimated survival >3 months; 6) Negative pregnancy test ≥7 days prior to start SRS; 7) Willing and able to give consent and participate in all evaluations              | 1) Radiosensitive tumor histology (germ cell, lymphoma, SCLC); 2) neurological or hemodynamic unstable; 3) autoimmune diseases; 4) >4 brain metastases; 5) LM in CSF or at MRI; 6) prior WBRT or SRS/SRT to the lesion to be resected                                                                                                                                                                                                                      | NaSRS + Tumor resection            | No | 1) Adverse events at 1-month; 2) Resection at 36-month; 3) Intracranial control at 36-month; 4) Progression free survival at 36-month; 5) LMD at 36-month; 6) Salvage therapy at 36-month                                              |
| <b>Clump [43]</b><br>(NCT02514915)    | Interventional – II Single group                       | University of Pittsburgh Medical Center              | 24 | 1) Age ≥18 years; 2) KPS ≥50; 3) Histological diagnosis primary tumor; 4) No contraindication MRI; 5) MRI-diagnosed ≤4 brain metastases of >1.5cm and ≤4cm diameter, ≥1 indicated for surgery; 6) estimated survival >12 weeks; 7) Willing and able to give consent and participate in all evaluations | 1) Radiosensitive tumor histology (germ cell, lymphoma, multiple myeloma, leukemia); 2) >5mm midline shift, 4 <sup>th</sup> ventricle compression, or signs hydrocephalus requiring emergency decompression; 3) >4 brain metastases; 4) proximity to optic apparatus or brainstem; 5) pregnancy, lactation, or not willing to undergo contraception                                                                                                        | NaSRS + Tumor resection            | No | 1) Overall survival at 36-month; 2) Distant failure at 3/12-month and then every 3 months up to 48-month; 3) Quality of life (FACT-BR) at 36-month                                                                                     |
| <b>Buchwald [44]</b><br>(NCT04895592) | Interventional – I Non-randomized, Parallel assignment | Emory University Hospital/Wisconsin Cancer Institute | 20 | 1) Age ≥18 years; 2) KPS ≥60; 3) Histological diagnosis primary tumor; 4) No contraindication MRI; 5) estimated survival >12 weeks; 6) Negative pregnancy test ≥7 days prior to start SRS; 7) Willing and able to give consent and participate in all evaluations                                      | 1) Receiving immunosuppressive medications; 2) pregnancy, lactation, or not willing to undergo contraception; 3) Psychological disorder, uncontrolled illness, or other reasons interfering with patient compliance                                                                                                                                                                                                                                        | NaSRS + Steroids + Tumor resection | No | 1) Adverse events of grade ≥3 at 4-month (comparing low-dose vs high-dose steroids)<br><br>1) Density of immune niche up to 24-month; 2) Local recurrence at 24-month; 3) Distant failure at 24-month; 4) Overall survival at 24-month |
| <b>Murphy [45]</b><br>(NCT01891318)   | Interventional – II Single group                       | Case Comprehensive Cancer Center Cleveland           | 36 | 1) Age ≥18 years; 2) KPS ≥70; 3) No contraindication MRI; 4) MRI-diagnosed <4 brain metastases of >2cm and ≤5cm diameter, one indicated for surgery; 5) Willing and able to give consent and participate in all evaluations                                                                            | 1) Radiosensitive tumor histology (germ cell, lymphoma, SCLC); 2) >4 brain metastases; 3) LM in CSF or at MRI; 4) prior WBRT; 5) proximity to optic chiasm and/or brainstem not allowing to deliver 10 Gy dose; 6) Psychological disorder, illness, or other reasons interfering with patient compliance                                                                                                                                                   | NaSRS + Tumor resection            | No | 1) Distant control at 36-month; 2) Radiation necrosis and steroid dependency at 36-month; 3) Salvage therapy at 36-month                                                                                                               |

|                                                |                                                        |                             |     |                                                                                                                                                                                                                                                                                         |                                                                                                                                                                                                                                                                                                                                                                                                                                                                                                                                     |                         |                                     |                                             |                                                                                                                                                                                                                                                                                                                                                                                                                                                                                                                        |
|------------------------------------------------|--------------------------------------------------------|-----------------------------|-----|-----------------------------------------------------------------------------------------------------------------------------------------------------------------------------------------------------------------------------------------------------------------------------------------|-------------------------------------------------------------------------------------------------------------------------------------------------------------------------------------------------------------------------------------------------------------------------------------------------------------------------------------------------------------------------------------------------------------------------------------------------------------------------------------------------------------------------------------|-------------------------|-------------------------------------|---------------------------------------------|------------------------------------------------------------------------------------------------------------------------------------------------------------------------------------------------------------------------------------------------------------------------------------------------------------------------------------------------------------------------------------------------------------------------------------------------------------------------------------------------------------------------|
| <b>Yan [46]<br/>(NCT03750227)</b>              | Interventional – II<br>Randomized, Parallel assignment | Mayo Clinic                 | 140 | 1) Age ≥18 years; 2) ECOG ≤2; 3) Histological diagnosis primary tumor; 4) MRI-diagnosed ≤10 brain metastases of ≤5cm diameter, one indicated for surgery; 5) Willing and able to give consent and participate in all evaluations                                                        | 1) Radiosensitive tumor histology (germ cell, lymphoma, multiple myeloma, leukemia); 2) Brain metastases located ≤5mm off the optic chiasm; 4) >10 brain metastases and/or of ≥5cm diameter; 5) LM in CSF or at MRI; 6) prior WBRT and/or brain surgery; 7) surgical indication of ≥2 brain metastases; 8) Indication for ≥4 weeks of steroids or bevacizumab; 9) pregnancy, lactation, or not willing to undergo contraception; 10) Psychological disorder, unstable illness, or other reasons interfering with patient compliance | NaSRS + Tumor resection | Tumor resection + Postoperative SRS | 1) CNS composite endpoint event at 60-month | 1) Overall survival at 60-month; 2) Adverse event at 60-month; 3) CNS composite endpoint event adjusted survival at 60-month; 4) CNS composite endpoint event free event rate at 60-month; 5) Quality of life (FACT-BR) at 6-month; 6) Rate completion therapy up to 60-month; 7) Time systemic therapy up to 60-month; 8) Time regional progression up to 60-month; 9) Time CNS progression up to 60-month; 10) Time subsequent therapy including WBRT up to 60-month; 11) Rate neurosurgery morbidity up to 60-month |
| <b>Faruqi and Patel [36]<br/>(NCT04474925)</b> | Interventional – II<br>Randomized, Parallel assignment | AHS Cancer Control Alberta  | 88  | 1) Age ≥18 years; 2) ECOG 0-2; 3) Histological diagnosis primary tumor; 4) Ability to complete neurocognitive assessment independently; 5) Negative pregnancy test ≥7 days prior to start SRS; 6) Willing and able to give consent and participate in all evaluations                   | 1) Radiosensitive tumor histology (germ cell, SCLC, hematologic malignancies); 2) LM in CSF or at MRI; 3) prior WBRT or SRS/SRT to the lesion to be resected; 4) unable to undergo MRI                                                                                                                                                                                                                                                                                                                                              | NaSRS + Tumor resection | Tumor resection + Postoperative SRS | 1) Local control at 12-month                | 1) Local control at 6/24-month; 2) Distant failure at 6/12/24-month; 3) LM at 6/12/24-month; 4) Overall survival at 6/12/24-month; 5) Hopkins verbal learning at 3/6/9/12/16/24-month; 6) Controlled oral word association at 3/6/9/12/16/24-month; 7) Trial Making test at 3/6/9/12/16/24-month                                                                                                                                                                                                                       |
| <b>Yeboa [37]<br/>(NCT03741673)</b>            | Interventional – II<br>Randomized, Parallel assignment | M.D. Anderson Cancer Center | 86  | 1) Age ≥18 years; 2) KPS ≥70 and ECOG ≥2; 3) Histological diagnosis primary tumor; 4) No contraindication MRI; 5) MRI-diagnosed brain metastases of ≤4cm diameter for single fraction or ≤7cm for multifraction; 6) Willing and able to give consent and participate in all evaluations | 1) Radiosensitive tumor histology (SCLC, germ cell, lymphoma, multiple myeloma, leukemia); 2) LM in CSF or at MRI ;3) pregnancy, lactation, or not willing to undergo contraception                                                                                                                                                                                                                                                                                                                                                 | NaSRS + Tumor resection | Tumor resection + Postoperative SRS | 1) LM-free at 12-month                      | 1) Local control at 12-month; 2) Distant control at 12-month; 3) Delta radiomics up to 48-month; 4) Circulating tumor cells up to 48-month; 5) CSF analysis up to 48-month; 6) Cognitive function (HVL-T-R, COWA, TMT, CTB-COMP) up to 12-month; 7) Symptom burden questionnaire                                                                                                                                                                                                                                       |

|                          |                                  |                                                     |    |                                                                                                                                                                                                                                                                                                                                                          |                                                                                                                                                                                                                                                                                                                                                                                                                                                                                                                                                                                                                    |                           |    |                                       |                                                                                                                                                       |
|--------------------------|----------------------------------|-----------------------------------------------------|----|----------------------------------------------------------------------------------------------------------------------------------------------------------------------------------------------------------------------------------------------------------------------------------------------------------------------------------------------------------|--------------------------------------------------------------------------------------------------------------------------------------------------------------------------------------------------------------------------------------------------------------------------------------------------------------------------------------------------------------------------------------------------------------------------------------------------------------------------------------------------------------------------------------------------------------------------------------------------------------------|---------------------------|----|---------------------------------------|-------------------------------------------------------------------------------------------------------------------------------------------------------|
|                          |                                  |                                                     |    |                                                                                                                                                                                                                                                                                                                                                          |                                                                                                                                                                                                                                                                                                                                                                                                                                                                                                                                                                                                                    |                           |    |                                       | (MDASI-BT) up to 48-month; 8) Quality of life (EQ-5D-5L) at 12-month                                                                                  |
| Wu [38]<br>(NCT05267587) | Interventional – II Single group | H. Lee Moffitt Cancer Center and Research Institute | 60 | 1) Age $\geq 18$ years; 2) KPS $\geq 60$ ; 3) No contraindication MRI; 4) MRI-diagnosed $\geq 1$ brain metastases of $>1$ cm and $\leq 6$ cm diameter, one indicated for surgery; 5) estimated survival $>3$ months; 6) Negative pregnancy test $\geq 7$ days prior to start SRS; 7) Willing and able to give consent and participate in all evaluations | 11) Radiosensitive tumor histology (germ cell, lymphoma, multiple myeloma, leukemia); 2) $>10$ mm midline shift, 4 <sup>th</sup> ventricle compression, signs intracranial hypertension requiring emergency decompression; 3) Brain metastases located $\leq 2$ mm off the optic chiasm or in the brainstem; 4) LM in CSF or at MRI; 5) prior WBRT or SRS/SRT to the lesion to be resected; 6) Prior chemotherapy $\leq 7$ days; 7) pregnancy, lactation, or not willing to undergo contraception; 9) Psychological disorder, unstable illness, autoimmunity, or other reasons interfering with patient compliance | HfNaSRS + Tumor resection | No | 1) Time to progression up to 12-month | 1) Time to death up to 12-month; 2) Time to LMD up to 12-month; 3) Local control at 6/12-month; 3) Distant failure at 6/12-month; 4) LM at 6/12-month |
